# Supplementary material for: Intraclass correlation – A discussion and demonstration of basic features
Source: PLOS journal article supplement (doi:10.1371/journal.pone.0219854), 2019-07-22
Supplement: S2 (10.1371/journal.pone.0219854.s002) [file journal.pone.0219854.s002]

## Appendix 2

### Derivation of the EMS (Expected Mean Square) relations

For this derivation we use a matrix with  $n = 3$  rows (subjects) and  $k = 2$  columns (measurements) as an illustration:

|          |          |           |
|----------|----------|-----------|
| $x_{11}$ | $x_{12}$ | $S_1$     |
| $x_{21}$ | $x_{22}$ | $S_2$     |
| $x_{31}$ | $x_{32}$ | $S_3$     |
| $M_1$    | $M_2$    | $\bar{x}$ |

As in Table 2 (main text),  $S_1$ ,  $S_2$ , and  $S_3$  are the mean values of the rows,  $M_1$  and  $M_2$  are the mean values of the columns and  $\bar{x}$  is the total mean value.

We will first assume Model 2, i.e. that each matrix element  $x_{ij}$  may be regarded as the sum of four terms,

$$x_{ij} = \mu + r_i + c_j + v_{ij} \quad (\text{A2-1})$$

where  $\mu$  is a constant,  $r_i$  is sampled from a normal distribution with standard deviation  $\sigma_r$ ,  $c_j$  is sampled from a normal distribution with standard deviation  $\sigma_c$  and  $v_{ij}$  is sampled from a normal distribution with standard deviation  $\sigma_v$ . Note that Model 1 is obtained simply by putting all  $c_j = 0$ .

Assuming that the model (A2-1) is used to generate the matrix  $x_{ij}$  shown above, we will now estimate the resulting mean squares, i.e.  $MSBS$ ,  $MSBM$ ,  $MSWS$ ,  $MSWM$  and  $MSE$ .

We observe that each matrix element  $x_{ij}$  is, apart from the constant  $\mu$ , the sum of three terms, each of which is sampled from a normal distribution. The total variance of  $x_{ij}$  is therefore the sum of the three independent variances  $\sigma_r^2$ ,  $\sigma_c^2$  and  $\sigma_v^2$ . It follows that each term in (A2-1) will give its own, independent contribution to each of the above five mean squares, for example to  $MSBS$ . In order to estimate these contributions, the simplest procedure is to study one term in (A2-1) at a time, assuming the others to be zero.

We may expect the constant  $\mu$  to give zero contribution to variance and thus zero contribution to each mean square quantity ( $MS$ ). This is easily verified. Putting each term in eq.(A2-1) except  $\mu$  equal to zero, the matrix and its averages in will be reduced to the following:

|       |       |       |
|-------|-------|-------|
| $\mu$ | $\mu$ | $\mu$ |
| $\mu$ | $\mu$ | $\mu$ |
| $\mu$ | $\mu$ | $\mu$ |
| $\mu$ | $\mu$ | $\mu$ |

We use the formulas in Appendix 1, and get, for example,

$$MSBS = \frac{SSBS}{n-1} = \frac{\sum_{i,j} (S_i - \bar{x})^2}{n-1} = \frac{\sum_{i,j} (\mu - \mu)^2}{n-1} = 0 \quad (\text{A2-2})$$

In a similar way we may easily confirm that  $MSBM = MSWS = MSWM = MSE = 0$ .

We therefore move on to the next term,  $r_i$ . Putting all other terms in (A2-1) equal to zero we get the following matrix:

$$\begin{array}{cc|c} r_1 & r_1 & r_1 \\ r_2 & r_2 & r_2 \\ r_3 & r_3 & r_3 \\ \hline \bar{r} & \bar{r} & \bar{r} \end{array}$$

Here,  $\bar{r}$  is the mean value of the three  $r_i$ . Again using Appendix 1, we get

$$MSBS = \frac{SSBS}{n-1} = \frac{\sum_{i,j} (S_i - \bar{x})^2}{n-1} = \frac{k \cdot \sum_i (S_i - \bar{x})^2}{n-1} = \frac{k \cdot \sum_i (r_i - \bar{r})^2}{n-1} \approx k \cdot \sigma_r^2 \quad (A2-3)$$

$$MSWM = \frac{SSWM}{k \cdot (n-1)} = \frac{\sum_{i,j} (x_{ij} - M_j)^2}{k \cdot (n-1)} = \frac{\sum_{i,j} (r_i - \bar{r})^2}{k \cdot (n-1)} = \frac{\sum_i (r_i - \bar{r})^2}{(n-1)} \approx \sigma_r^2$$

where the " $\approx$ " sign means "is an estimate of". The last member in both equations follows when we realize that

$$\sum_i (r_i - \bar{r})^2 / (n-1)$$

is the square of the standard deviation of the three  $r_i$  values about their mean value  $\bar{r}$ ; therefore, it is an estimate of the variance  $\sigma_r^2$ . In fact, if this sampling of three  $r_i$  values from a normal distribution with variance  $\sigma_r^2$  is repeated a large number of times, then eq.(A2-3) means for example that the average value of  $MSWM$  will tend to be equal to  $\sigma_r^2$ .

By similar procedures we may easily show that  $MSBM = MSWS = 0$ . From Appendix 1 we find the exact relation

$$MSE = \frac{k}{k-1} MSWM - \frac{1}{k-1} MSBS \quad (A2-4)$$

Using (A2-3) in (A2-4), we find  $MSE \approx 0$ . In summary, therefore, the  $r_i$  term gives the contributions

$$\begin{aligned} MSBS &\approx k \cdot \sigma_r^2 \\ MSBM &= 0 \\ MSWS &= 0 \\ MSWM &\approx \sigma_r^2 \\ MSE &\approx 0 \end{aligned} \quad (A2-5)$$

We next put all terms in (A2-1) except the  $c_j$  equal to zero. The resulting matrix is

|       |       |           |
|-------|-------|-----------|
| $c_1$ | $c_2$ | $\bar{c}$ |
| $c_1$ | $c_2$ | $\bar{c}$ |
| $c_1$ | $c_2$ | $\bar{c}$ |
| $c_1$ | $c_2$ | $\bar{c}$ |

Here,  $\bar{c}$  is the mean value of the three  $c_j$ . We need not do all the above calculations again, but merely observe that rows and columns have changed roles. Thus, we will obtain the desired formulas simply by replacing  $k$  by  $n$ ,  $\sigma_r$  by  $\sigma_c$ ,  $MSBS$  by  $MSBM$ ,  $MSBM$  by  $MSBS$ ,  $MSWS$  by  $MSWM$  and  $MSWM$  by  $MSWS$ . For the MSE, we use again eq.(A2-5). We show  $MSWS$  explicitly:

$$MSWS = \frac{SSWS}{n \cdot (k-1)} = \frac{\sum_{i,j} (x_{ij} - S_i)^2}{n \cdot (k-1)} = \frac{\sum_{i,j} (c_j - \bar{c})^2}{n \cdot (k-1)} = \frac{\sum_i (c_j - \bar{c})^2}{(k-1)} \approx \sigma_c^2 \quad (\text{A2-6})$$

where, again, the last member follows since we recognize the square of the standard deviation of the  $c_j$  about their mean value in the next last member. The result, i.e. the contributions from the  $c_j$  term, is therefore

$$\begin{aligned} MSBS &= 0 \\ MSBM &\approx n \cdot \sigma_c^2 \\ MSWS &\approx \sigma_c^2 \\ MSWM &= 0 \\ MSE &= 0 \end{aligned} \quad (\text{A2-7})$$

Here we may insert the derivation in the case that the  $c_j$  terms are fixed, i.e. Model 3. The matrix looks precisely the same. However, in eq.(A2-6) we do not make the estimate ( $\approx \sigma_c^2$ ) in the last member, but simply use the fact that

$$MSWS = \frac{\sum_j (c_j - \bar{c})^2}{(k-1)} \equiv \theta_c^2 \quad (\text{A2-8})$$

where the customary symbol  $\theta_c^2$  is defined. For Model 3 the contributions from the  $c_j$  term are therefore

$$\begin{aligned} MSBS &= 0 \\ MSBM &= n \cdot \theta_c^2 \\ MSWS &= \theta_c^2 \\ MSWM &= 0 \\ MSE &= 0 \end{aligned} \quad (\text{A2-9})$$

We now consider the last term in (A2-1), i.e. we put all terms equal to zero except  $v_{ij}$ . The resulting matrix is given by

|          |          |           |
|----------|----------|-----------|
| $v_{11}$ | $v_{12}$ | $R_1$     |
| $v_{21}$ | $v_{22}$ | $R_2$     |
| $v_{31}$ | $v_{32}$ | $R_3$     |
| $C_1$    | $C_2$    | $\bar{v}$ |

Here  $R_i$  and  $C_j$  denote the row and column mean values. We may here observe that each matrix element  $v_{ij}$  is obtained by sampling from a normal distribution with variance  $\sigma_v^2$ . Moreover, each  $R_i$  value is the mean value of  $k = 2$  matrix elements; its variance should therefore be  $\sigma_v^2/k$ . In the same way, each  $C_j$  value is the mean value of  $n = 3$  matrix elements; its variance should therefore be  $\sigma_v^2/n$ .

From this we get

$$MSBS = \frac{SSBS}{n-1} = \frac{k \cdot \sum_i (S_i - \bar{x})^2}{n-1} = \frac{k \cdot \sum_i (R_i - \bar{v})^2}{n-1} \approx \sigma_v^2 \quad (\text{A2-10})$$

The last member follows if we observe that the next last member, apart from the factor  $k$ , is the square of the standard deviation of the  $R_i$  values about their mean value  $\bar{v}$ , i.e. it is an estimate of their variance:

$$\frac{\sum_i (R_i - \bar{v})^2}{n-1} \approx \sigma_v^2 / k \quad (\text{A2-11})$$

Proceeding in a similar manner to estimate  $MSBM$ ,  $MSWM$  and  $MSWS$ , and using (A2-5) to estimate  $MSE$ , we find the following simple result for the contributions from the  $v_{ij}$  term:

$$\begin{aligned} MSBS &\approx \sigma_v^2 \\ MSBM &\approx \sigma_v^2 \\ MSWS &\approx \sigma_v^2 \\ MSWM &\approx \sigma_v^2 \\ MSE &\approx \sigma_v^2 \end{aligned} \quad (\text{A2-12})$$

For Model 2 we now find the total expression for the mean squares as estimates of the variances by adding the contributions (A2-5), (A2-7) and (A2-12). This gives

$$\begin{aligned} MSBS &\approx k \cdot \sigma_r^2 + \sigma_v^2 \\ MSBM &\approx n \cdot \sigma_c^2 + \sigma_v^2 \\ MSWS &\approx \sigma_c^2 + \sigma_v^2 \\ MSWM &\approx \sigma_r^2 + \sigma_v^2 \\ MSE &\approx \sigma_v^2 \end{aligned} \quad (\text{A2-13})$$

The estimates for Model 1 are obtained from (A2-13) simply by putting  $\sigma_c^2 = 0$ , and the estimates for Model 3 by replacing  $\sigma_c^2$  with  $\theta_c^2$ , as shown by (A2-9).
